# Supplementary material for: Enhancing light coupling and emission efficiencies of AlGaN thin film and AlGaN/GaN multiple quantum wells with periodicity-wavelength matched nanostructure array
Source: Royal Society of Chemistry journal article supplement (doi:10.1039/c7nr04341d), 2017-01-01
Supplement: c7nr04341d1.pdf [file c7nr04341d1.pdf]

## Supporting information

# Enhancing light coupling and emission efficiencies of AlGaIn thin film and AlGaIn/GaN Multiple Quantum Wells with periodicity-wavelength matched nanostructure array

Wei Guo<sup>1\*</sup>, Zhenhai Yang<sup>1</sup>, Junmei Li<sup>1</sup>, Xi Yang<sup>1</sup>, Yun Zhang<sup>2</sup>, Junxi Wang<sup>2</sup>, Kuan  
Chee<sup>3</sup>, Pingqi Gao<sup>1</sup>, and Jichun Ye<sup>1\*\*</sup>

<sup>1</sup>. Ningbo Institute of Materials Technology and Engineering, Chinese Academy of Sciences, Ningbo 315201, ,Zhejiang, China.

<sup>2</sup>. Semiconductor Lighting Technology Research and Development Center, Institute of Semiconductors, Chinese Academy of Sciences, Beijing 100083, China

<sup>3</sup>. Faculty of Science and Engineering, The University of Nottingham Ningbo, 315100, China

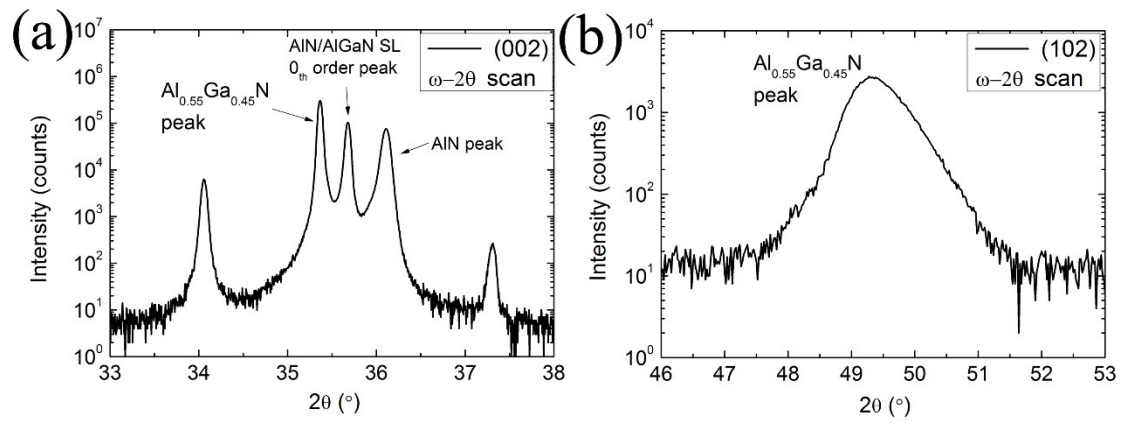

**Figure S1, HRXRD symmetric (002) scan (a) and asymmetric (102) scan (b) of  $\text{Al}_{0.55}\text{Ga}_{0.45}\text{N}$  thin film grown on AlN/sapphire substrate, where Al content  $x_{\text{Al}}=0.54$  was achieved by calculation of lattice parameters of AlGaIn**

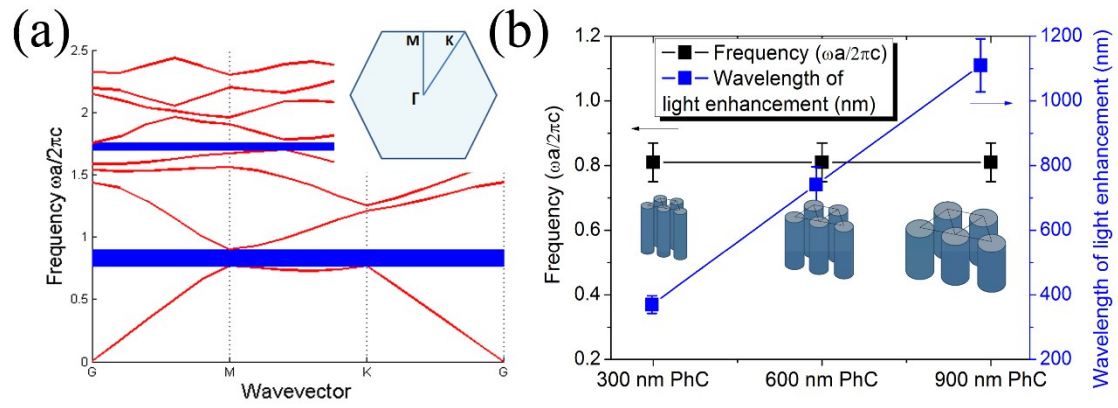

**Figure S2, Band structure of 2D AlGaIn PhC with periodicity of 300 nm (a). Inset images illustrates high symmetric points inside a hexagon-shape unit cell. Normalized frequencies and wavelength of light enhancement as a function of PhC periodicity (b)**

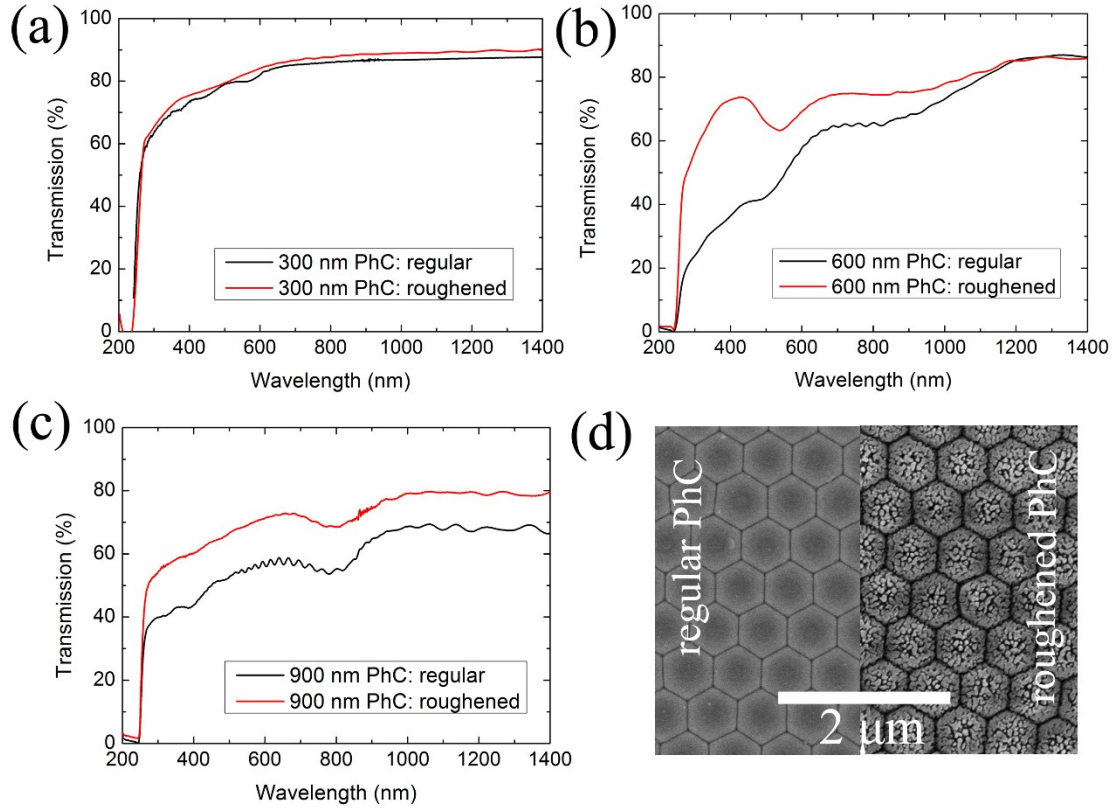

**Figure S3, Light transmission of 300 nm PhC (a), 600 nm PhC (b) and 900 nm PhC (c) patterned AlGaIn with and without sub-wavelength scale nano-roughening on top; Top-view SEM images of 600 nm periodicity regular PhC and roughened PhC patterned AlGaIn (d)**
